# Supplementary material
Source: PubMed Central journal article supplement (PMC2423161)

# Kappes et al., Supplemental Figures

## SFig.1

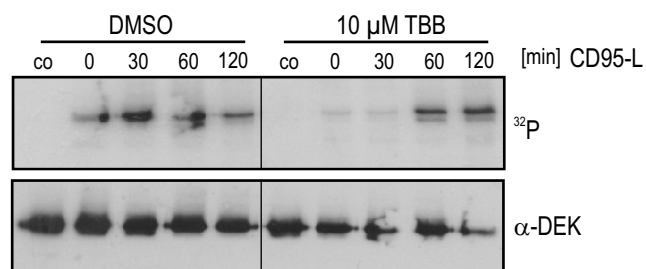

## SFig.2

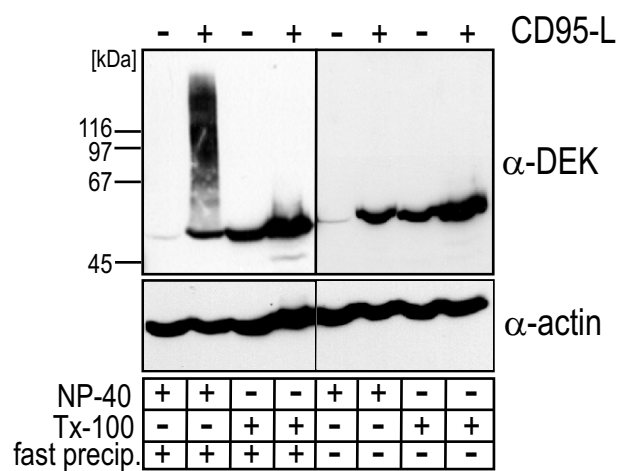

## SFig.3

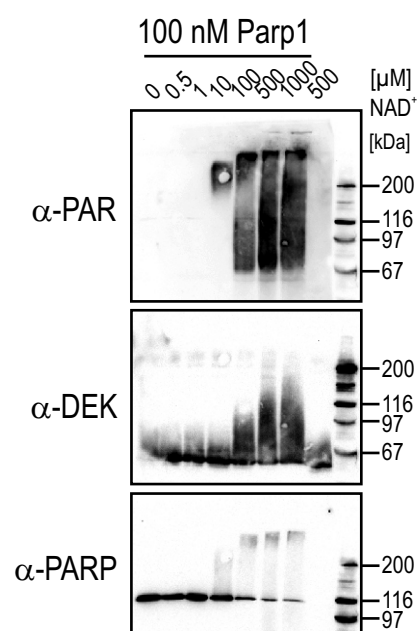

# Kappes et al., Supplemental Figures

## SFig.4

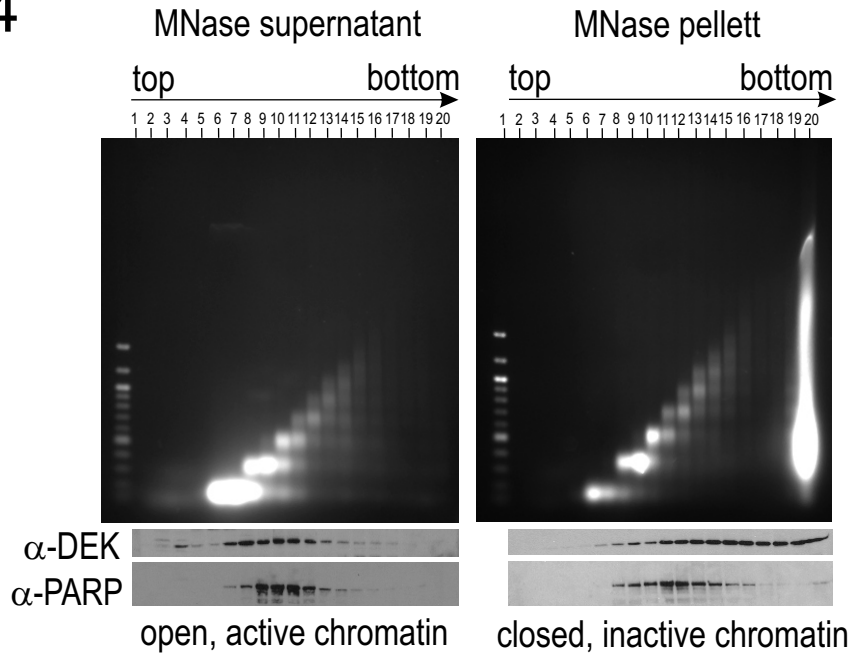

## SFig.5

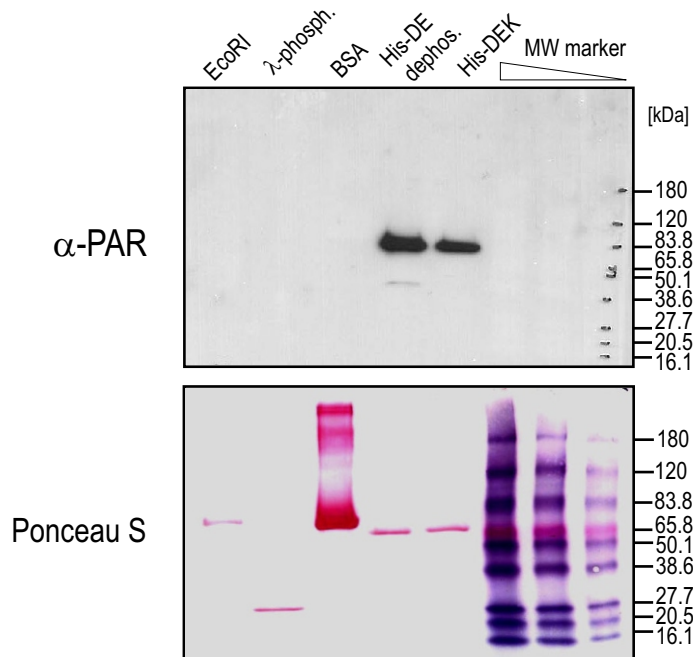

## SFig.6

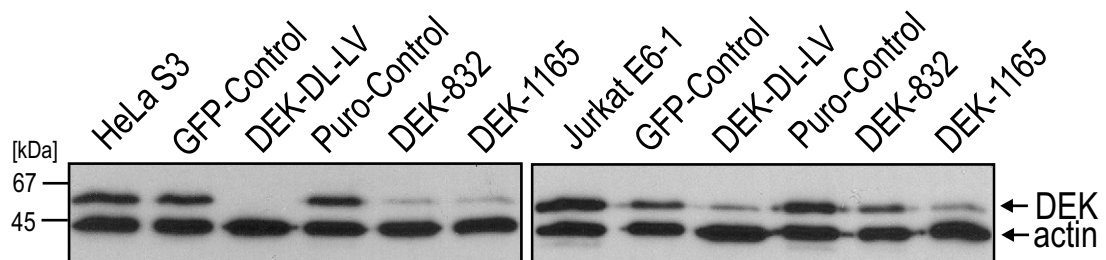

# Kappes et al., Supplemental Figures

## SFig.7

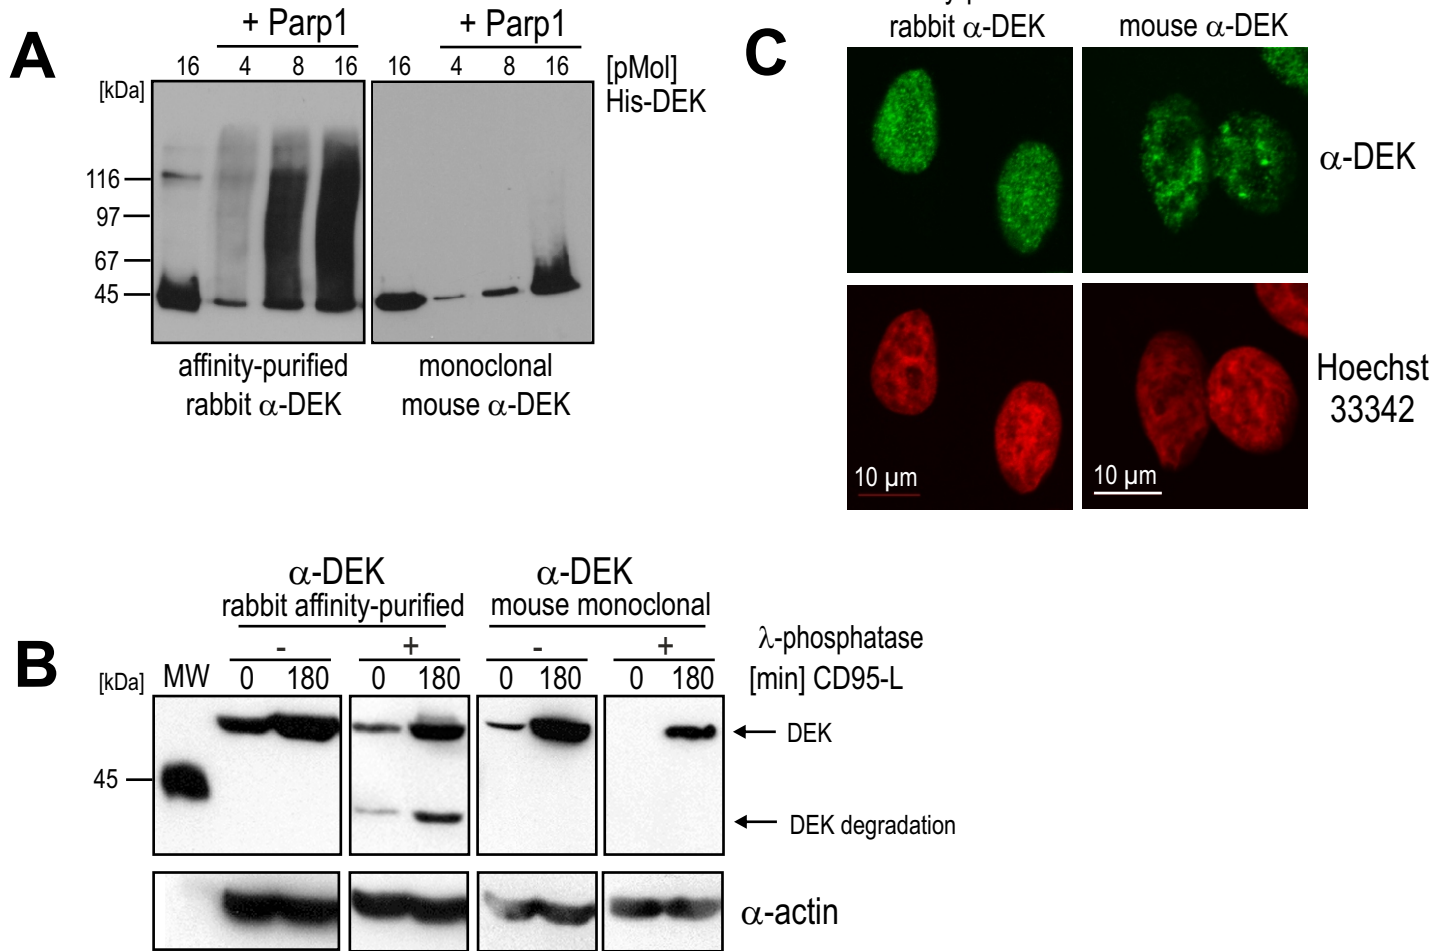

## SFig.8

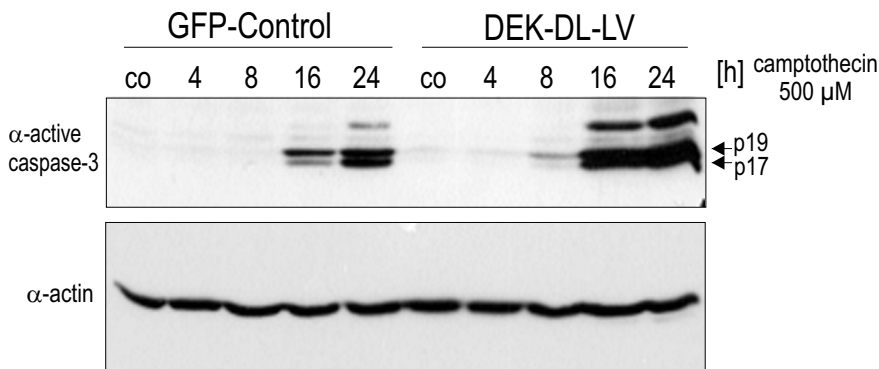

# Kappes et al., Supplemental Figures

## SFig.9

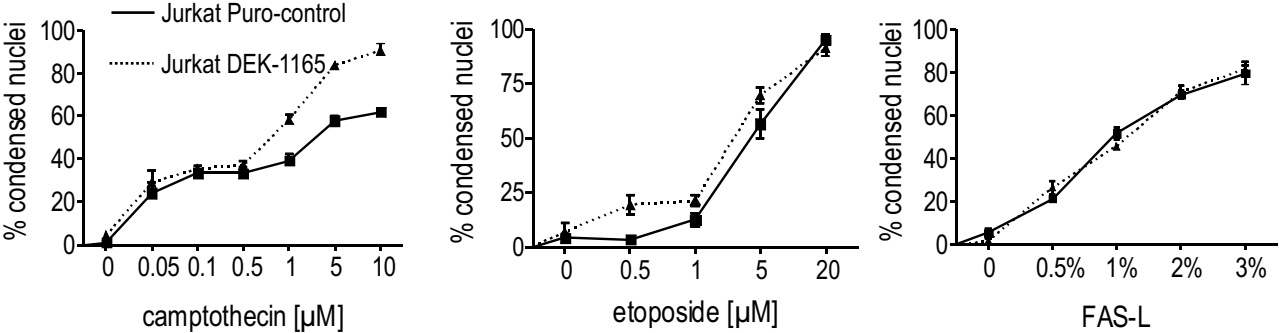

## SFig.10

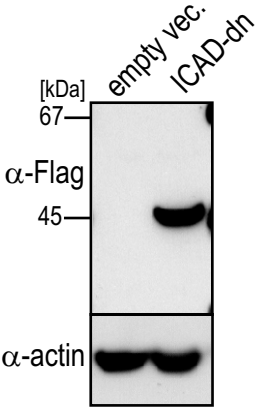

Supplement: supp_28_10_3245__1.pdf [file supp_28_10_3245__1.pdf]
